# Supplementary material for: Cooperative transformation of nitroarenes and biomass-based alcohols catalyzed by CuNiAlOx
Source: Royal Society of Chemistry journal article supplement (doi:10.1039/c4ra16081a), 2014-12-22

## Supporting Information

### The Cooperative Transformation of Nitroarenes and Biomass-Based Alcohols Catalyzed by $\text{CuNiAlO}_x$

Xingchao Dai, Xinjiang Cui, Hangkong Yuan, Youquan Deng and Feng Shi\*

1. **Figure S1.** TEM and HR-TEM images of  $\text{Cu}_1\text{Ni}_4\text{Al}_1\text{O}_x$ -450 (a, b),  $\text{Cu}_2\text{Ni}_4\text{Al}_{0.5}\text{O}_x$ -450 (c, d) and  $\text{Cu}_1\text{Ni}_4\text{Al}_{0.5}\text{O}_x$ -450 (e, f).

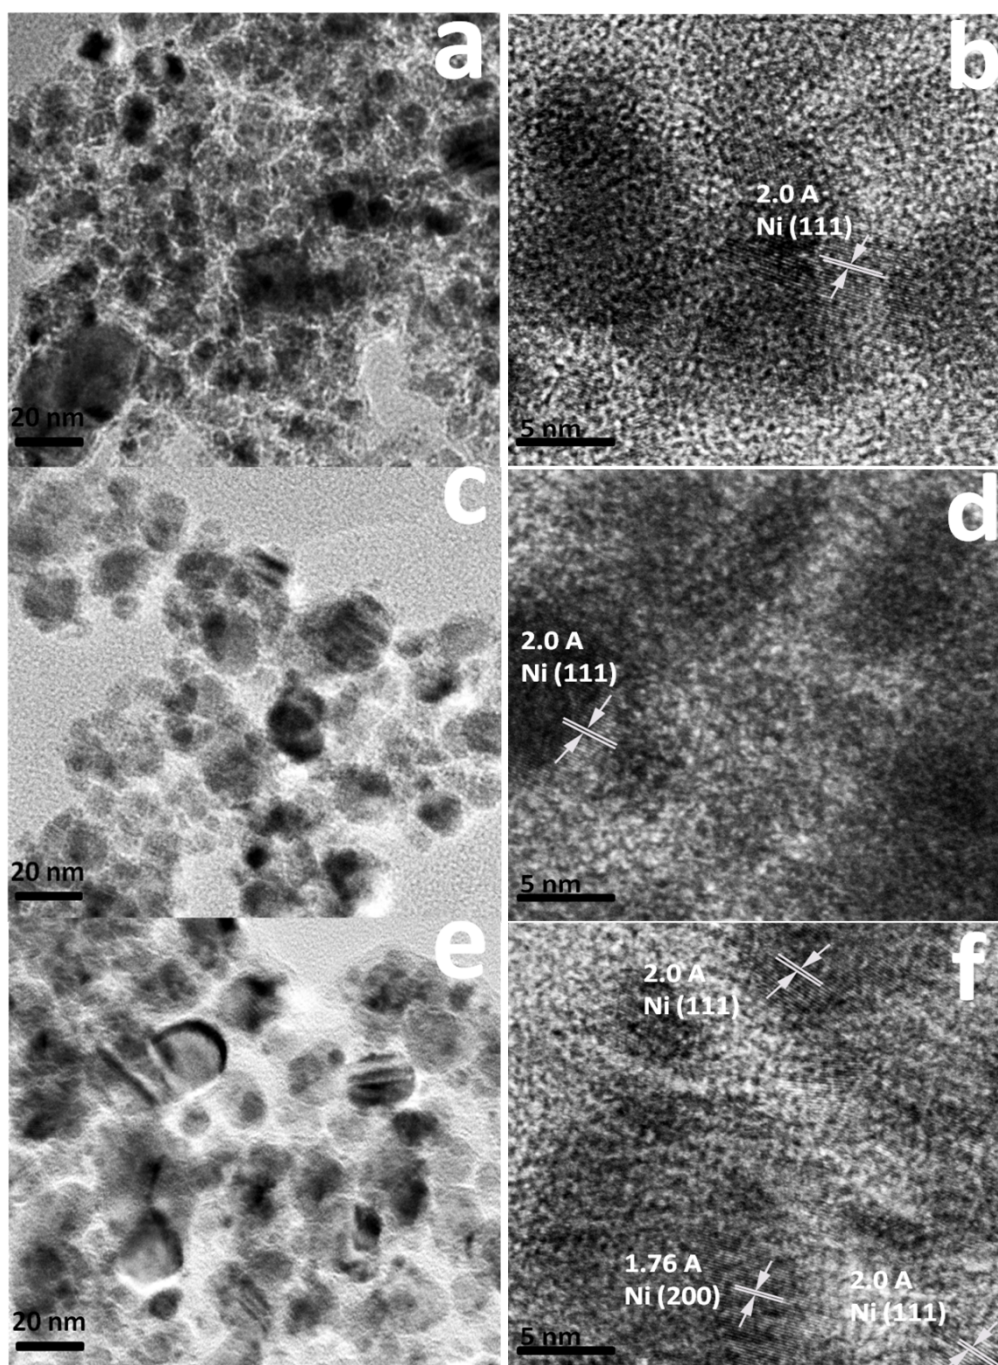

2. **Figure S2.** TEM and HR-TEM images of  $\text{Cu}_1\text{Ni}_4\text{Al}_{0.5}\text{O}_x-350$  (a, b) and  $\text{Cu}_1\text{Ni}_4\text{Al}_{0.5}\text{O}_x-650$  (c, d).

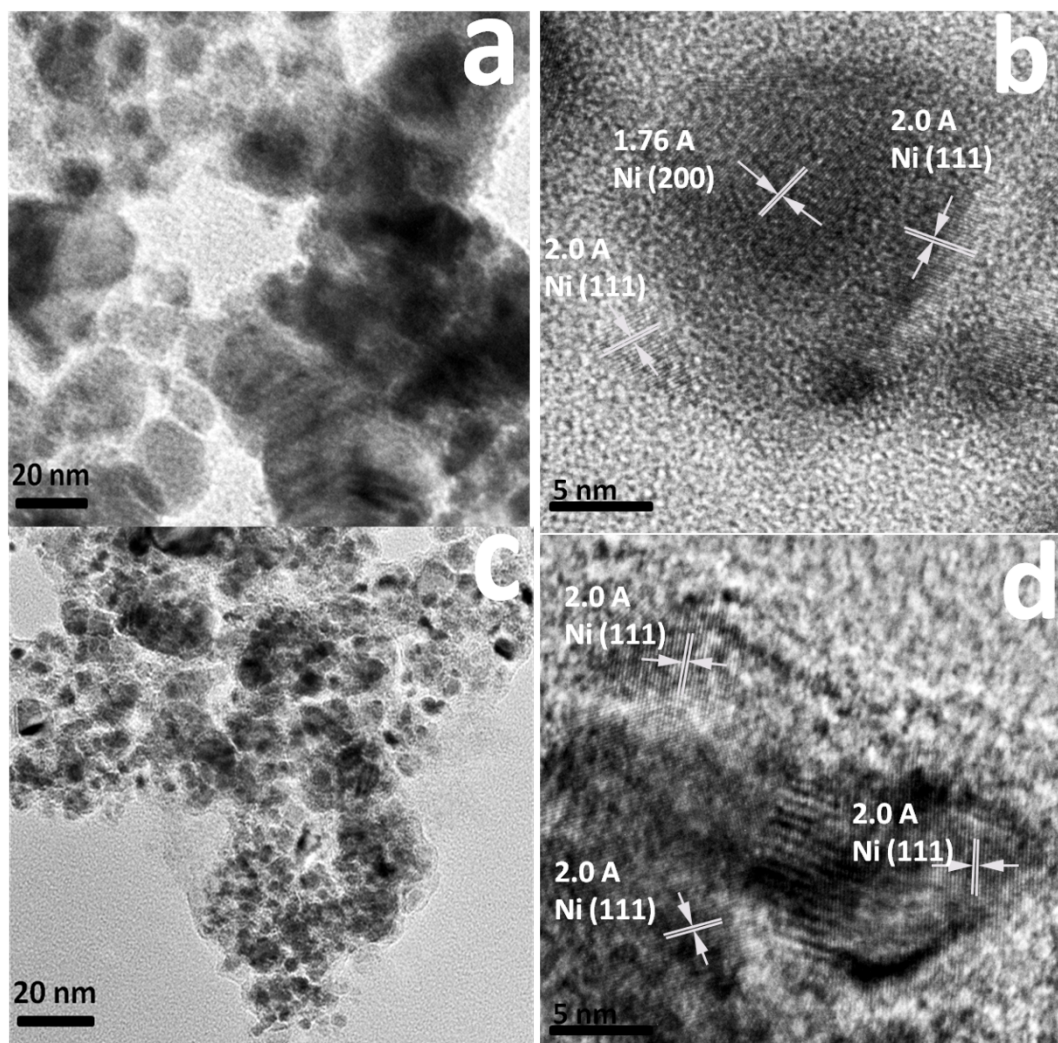

3. **Figure S3.** XPS spectra of  $\text{Cu}_{2p}$  and  $\text{Ni}_{2p}$  of a)  $\text{Cu}_1\text{Ni}_4\text{AlO}_x-450$ , b)  $\text{Cu}_2\text{Ni}_4\text{Al}_{0.5}\text{O}_x-450$ , c)  $\text{Cu}_1\text{Ni}_4\text{Al}_{0.5}\text{O}_x-350$  d)  $\text{Cu}_1\text{Ni}_4\text{Al}_{0.5}\text{O}_x-450$ , e)  $\text{Cu}_1\text{Ni}_4\text{Al}_{0.5}\text{O}_x-600$  and f)  $\text{Cu}_1\text{Ni}_4\text{Al}_{0.5}\text{O}_x-650$ .

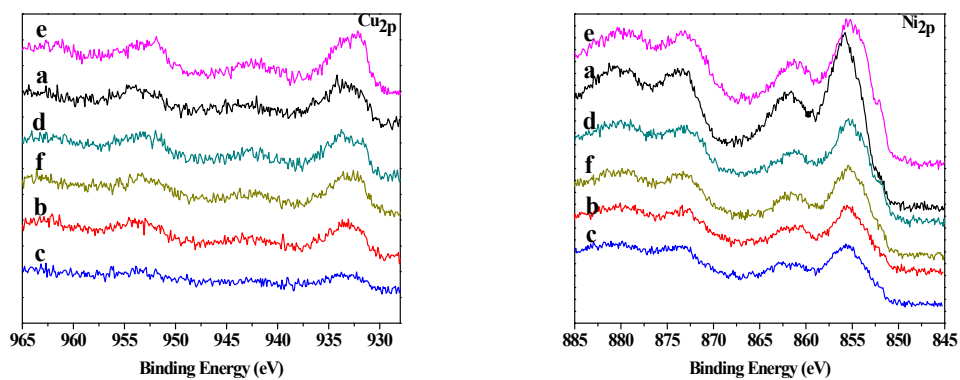

Supplement: c4ra16081a1.pdf [file c4ra16081a1.pdf]
